# Supplementary material for: Piezoelectricity of hexagonal boron nitrides improves bone tissue generation as tested on osteoblasts
Source: publisher site journal article supplement (doi:10.3762/bjnano.16.78), 2025-07-07
Supplement: Additional file 1 [file 2190-4286-16-78-S1.pdf]

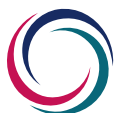

## Supporting Information

for

### **Piezoelectricity of hexagonal boron nitrides improves bone tissue generation as tested on osteoblasts**

Sevin Adiguzel, Nilay Cicek, Zehra Cobandede, Feray B. Misirlioglu, Hulya Yilmaz and Mustafa Culha

*Beilstein J. Nanotechnol.* **2025**, *16*, 1068–1081. doi:10.3762/bjnano.16.78

## Additional figures

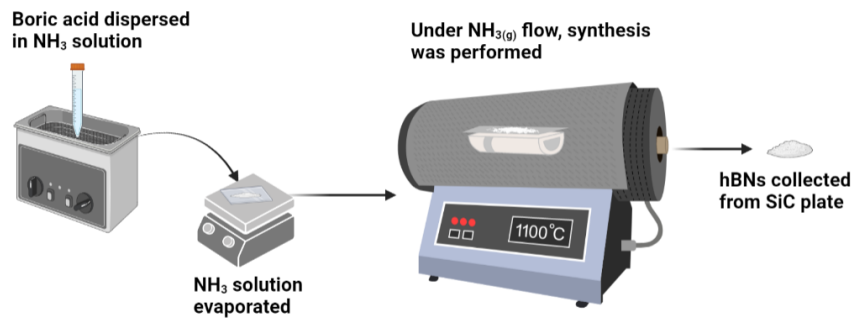

**Figure S1:** Schematic representation of the synthesis process of hBNs using the CVD method. Created in BioRender. Adıgüzel, Ş. (2025) <https://BioRender.com/1xs905s>. This content is not subject to CC BY 4.0.

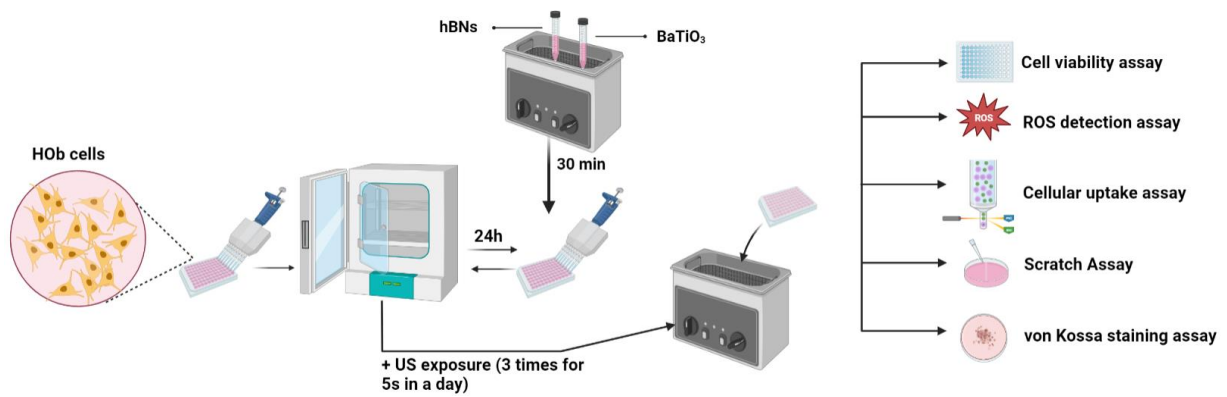

**Figure S2:** Schematic representation of the in vitro studies Created in BioRender. Adıgüzel, Ş. (2025) <https://BioRender.com/4y6g1p7>. This content is not subject to CC BY 4.0.

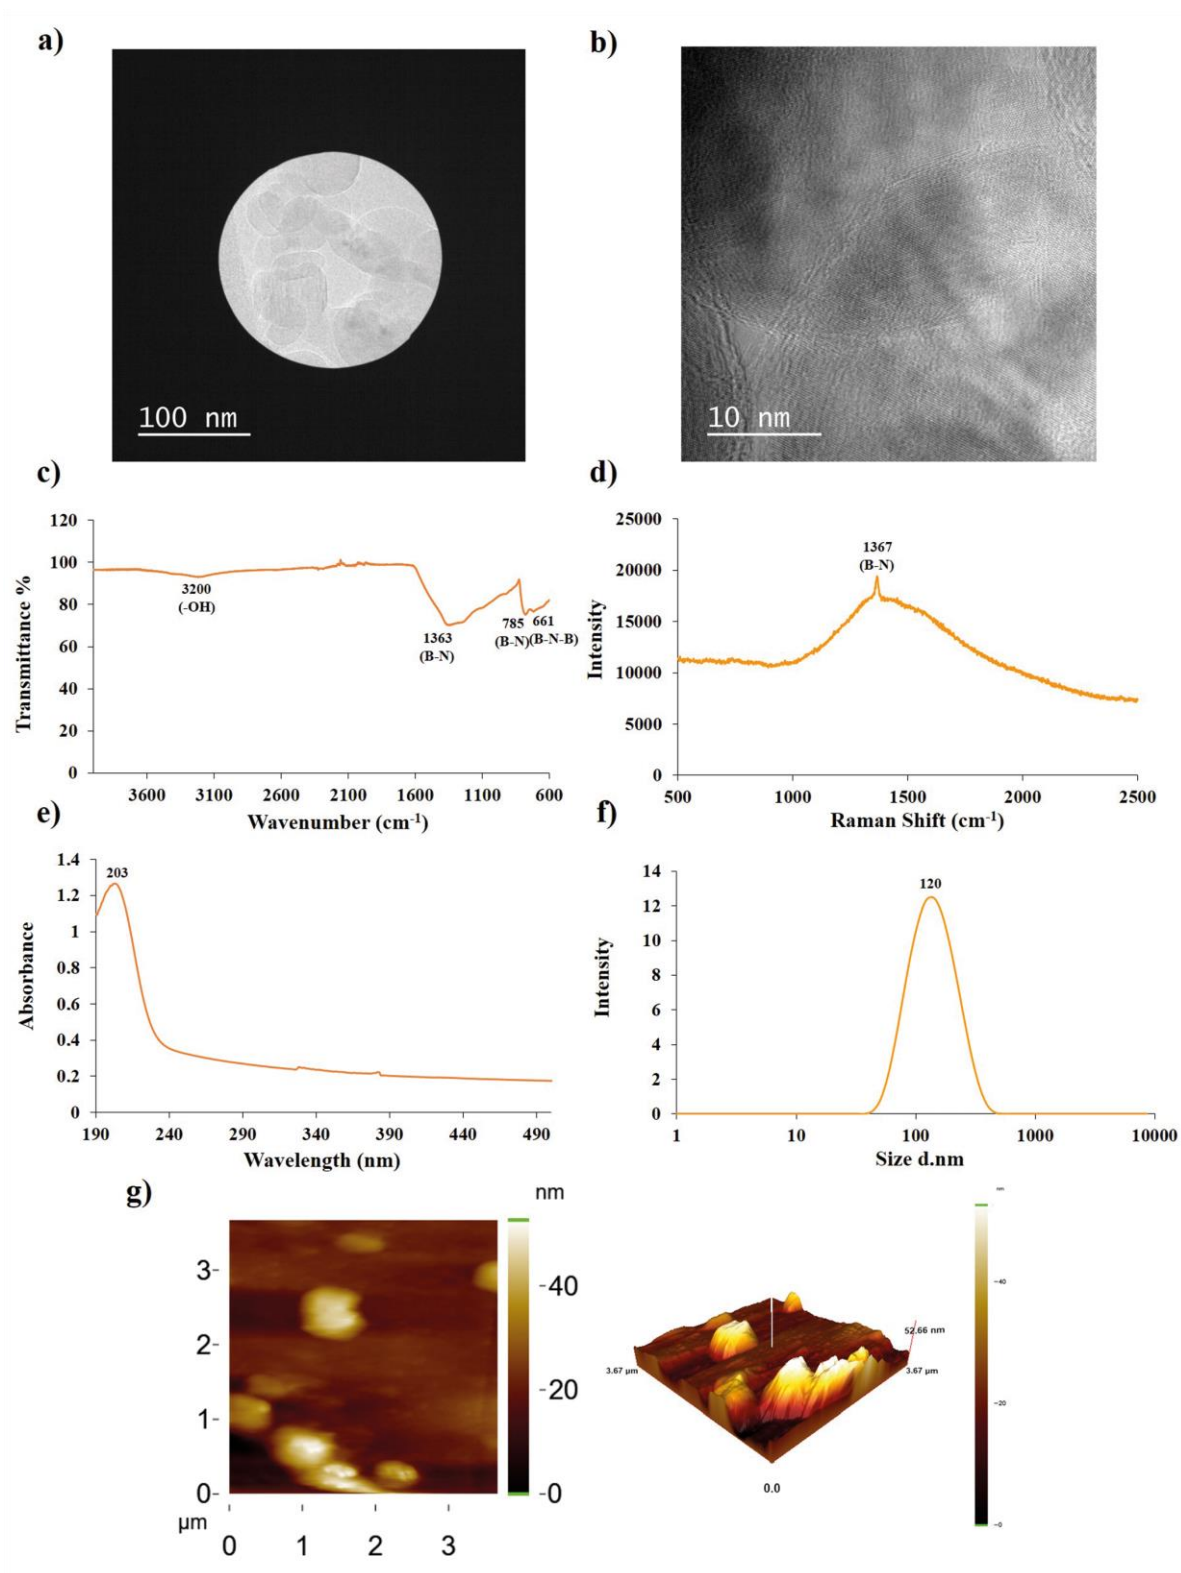

**Figure S3:** (a) and (b) TEM images with increasing magnifications, (c) FTIR, (d) Raman, (e) UV-vis, (f) DLS spectra, and (g) topography of hBNs.

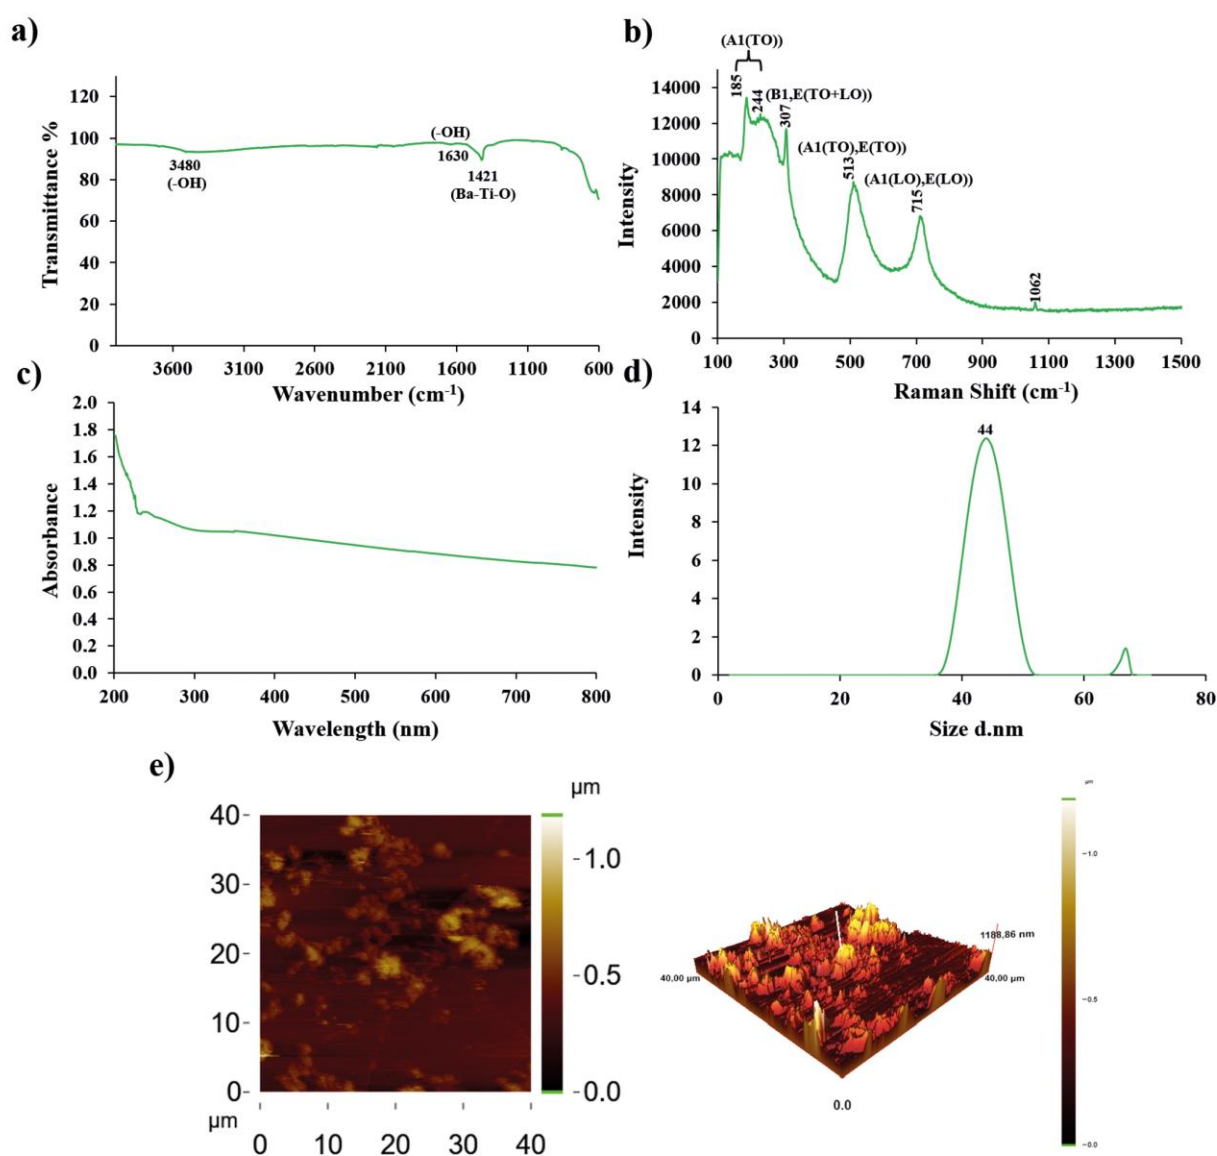

**Figure S4:** (a) FTIR, (b) Raman, (c) UV-vis, (d) DLS spectra, and (e) topography of  $\text{BaTiO}_3$ .
